# Supplementary figures and images for: Measuring the sequence-affinity landscape of antibodies with massively parallel titration curves
Source: eLife journal article supplement (doi:10.7554/elife.23156), 2016-12-30

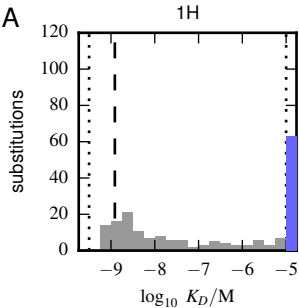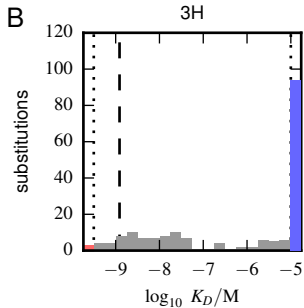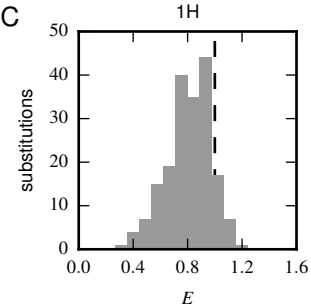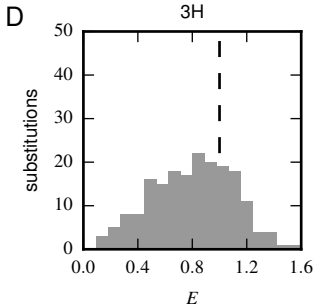

Supplement: supp [file elife-23156-supp-v1.zip]

A

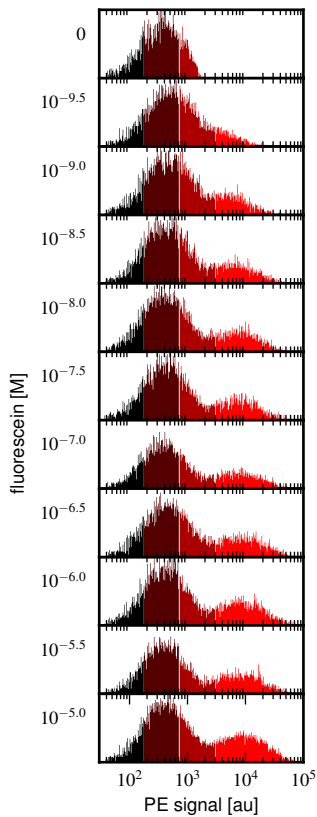

B

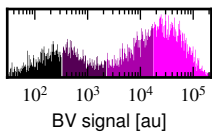

C

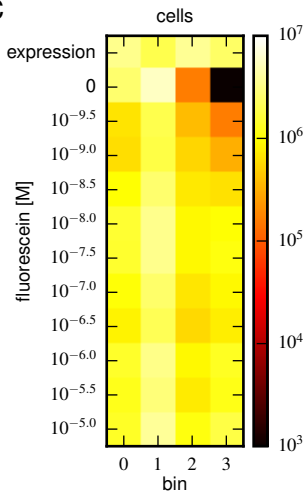

D

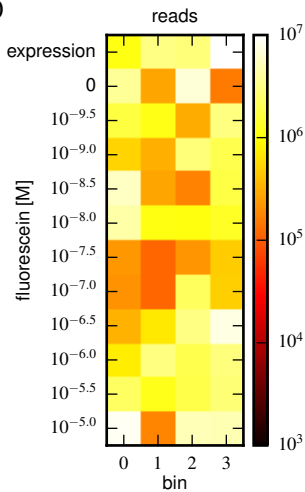

Supplement: supp [file elife-23156-supp-v1.zip]

A

simulated

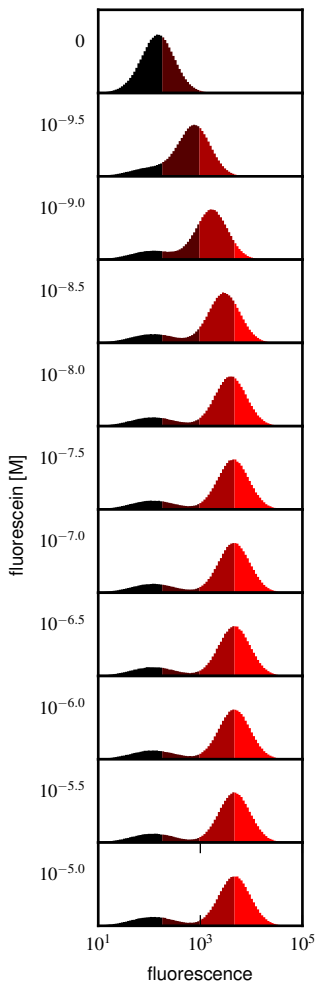

B

cells

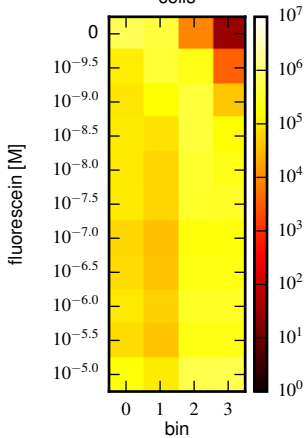

C

reads

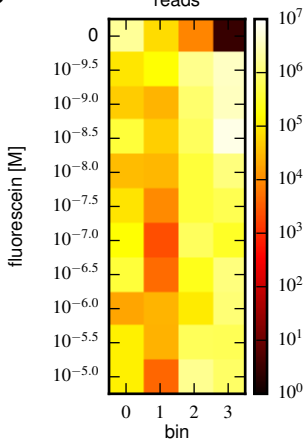

Supplement: supp [file elife-23156-supp-v1.zip]

A

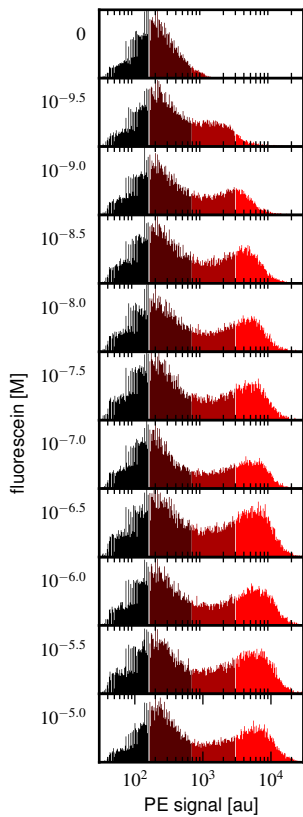

B

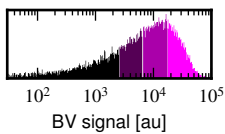

C

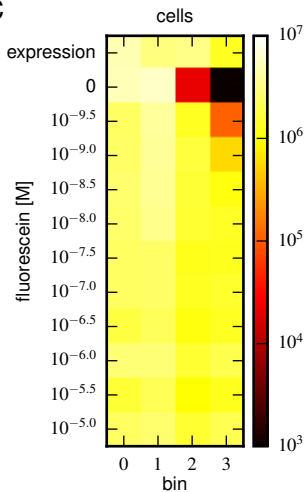

D

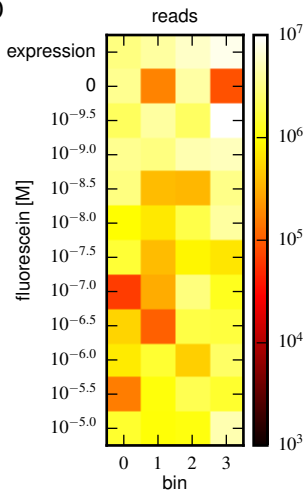

Supplement: supp [file elife-23156-supp-v1.zip]

A

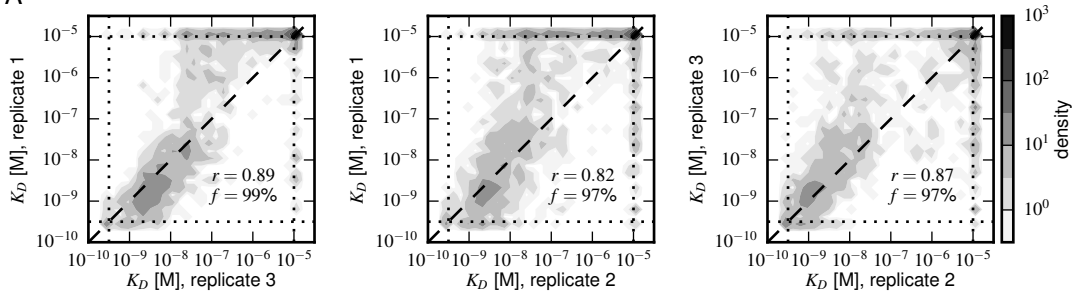

B

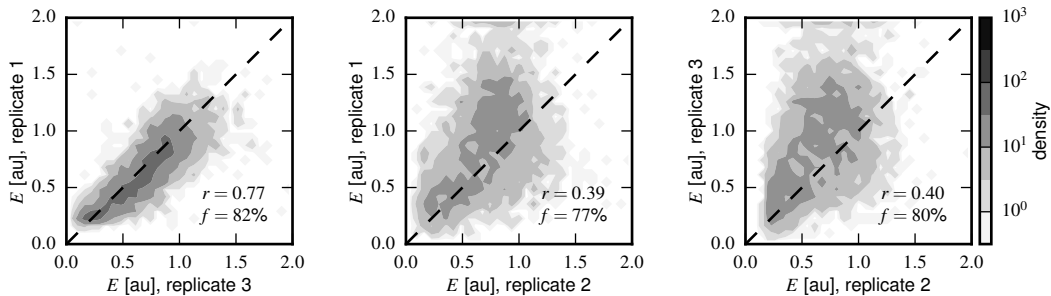

Supplement: supp [file elife-23156-supp-v1.zip]

2  $\mu$ M fluorescein

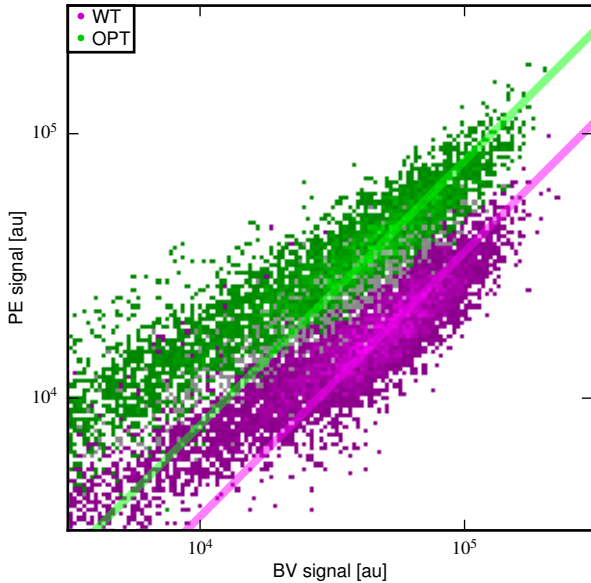

Supplement: supp [file elife-23156-supp-v1.zip]

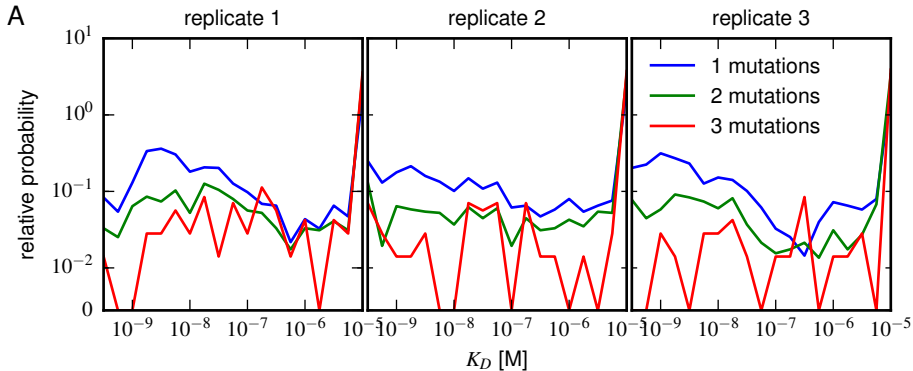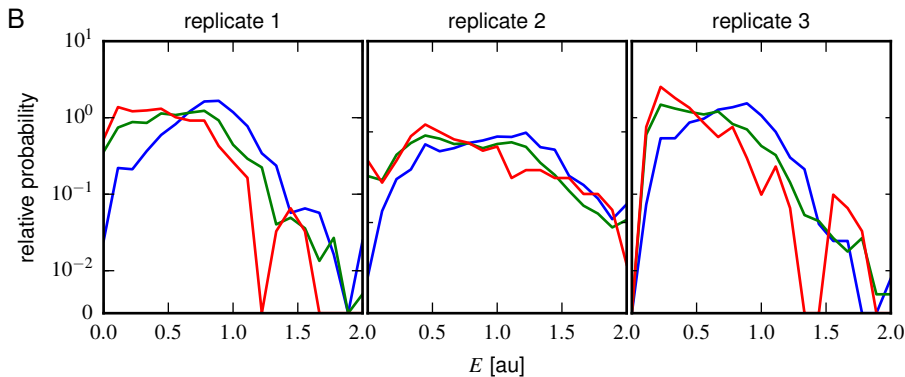

Supplement: supp [file elife-23156-supp-v1.zip]

A

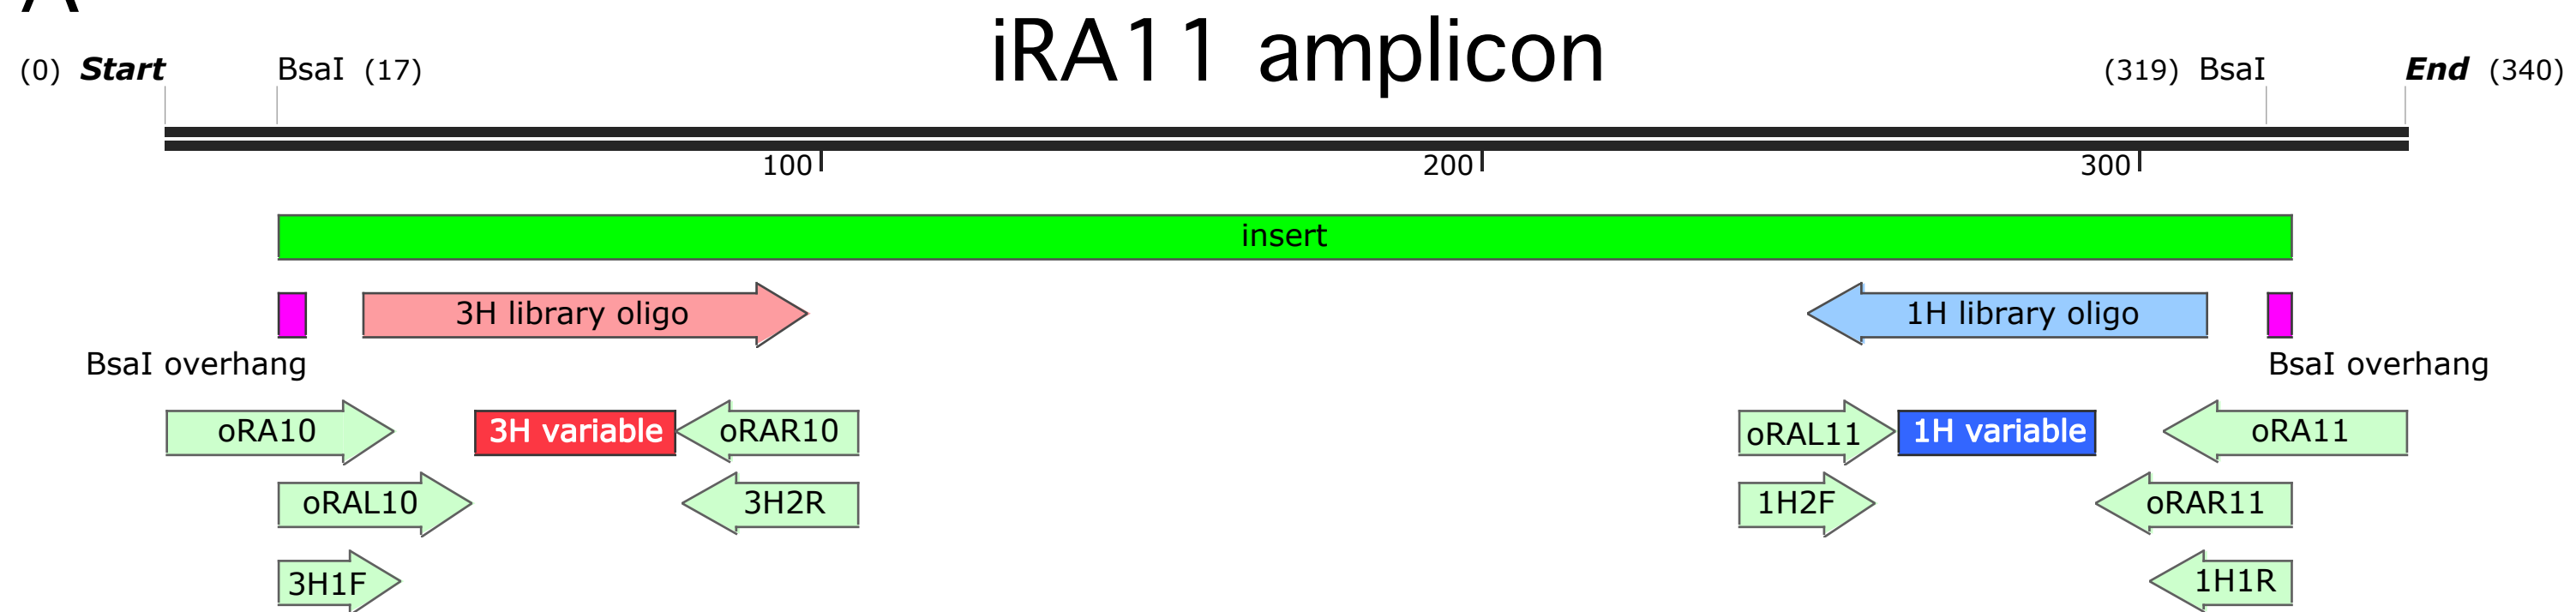

B

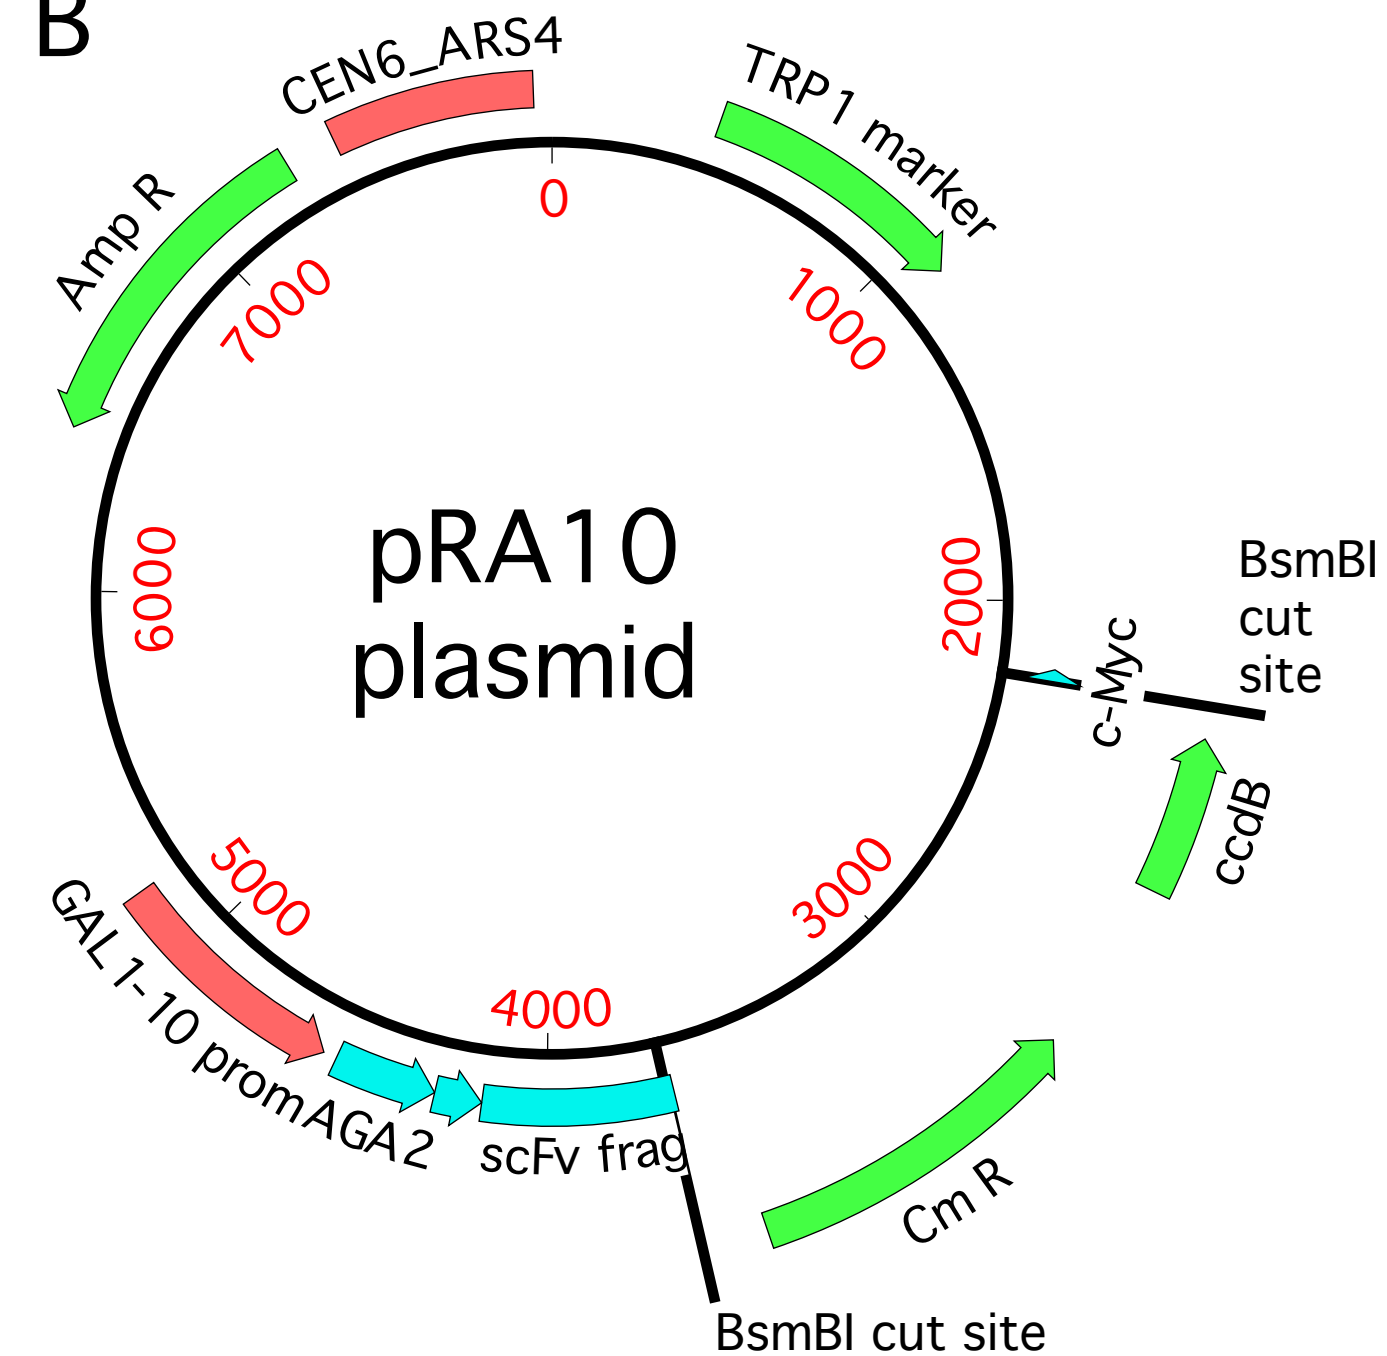

C

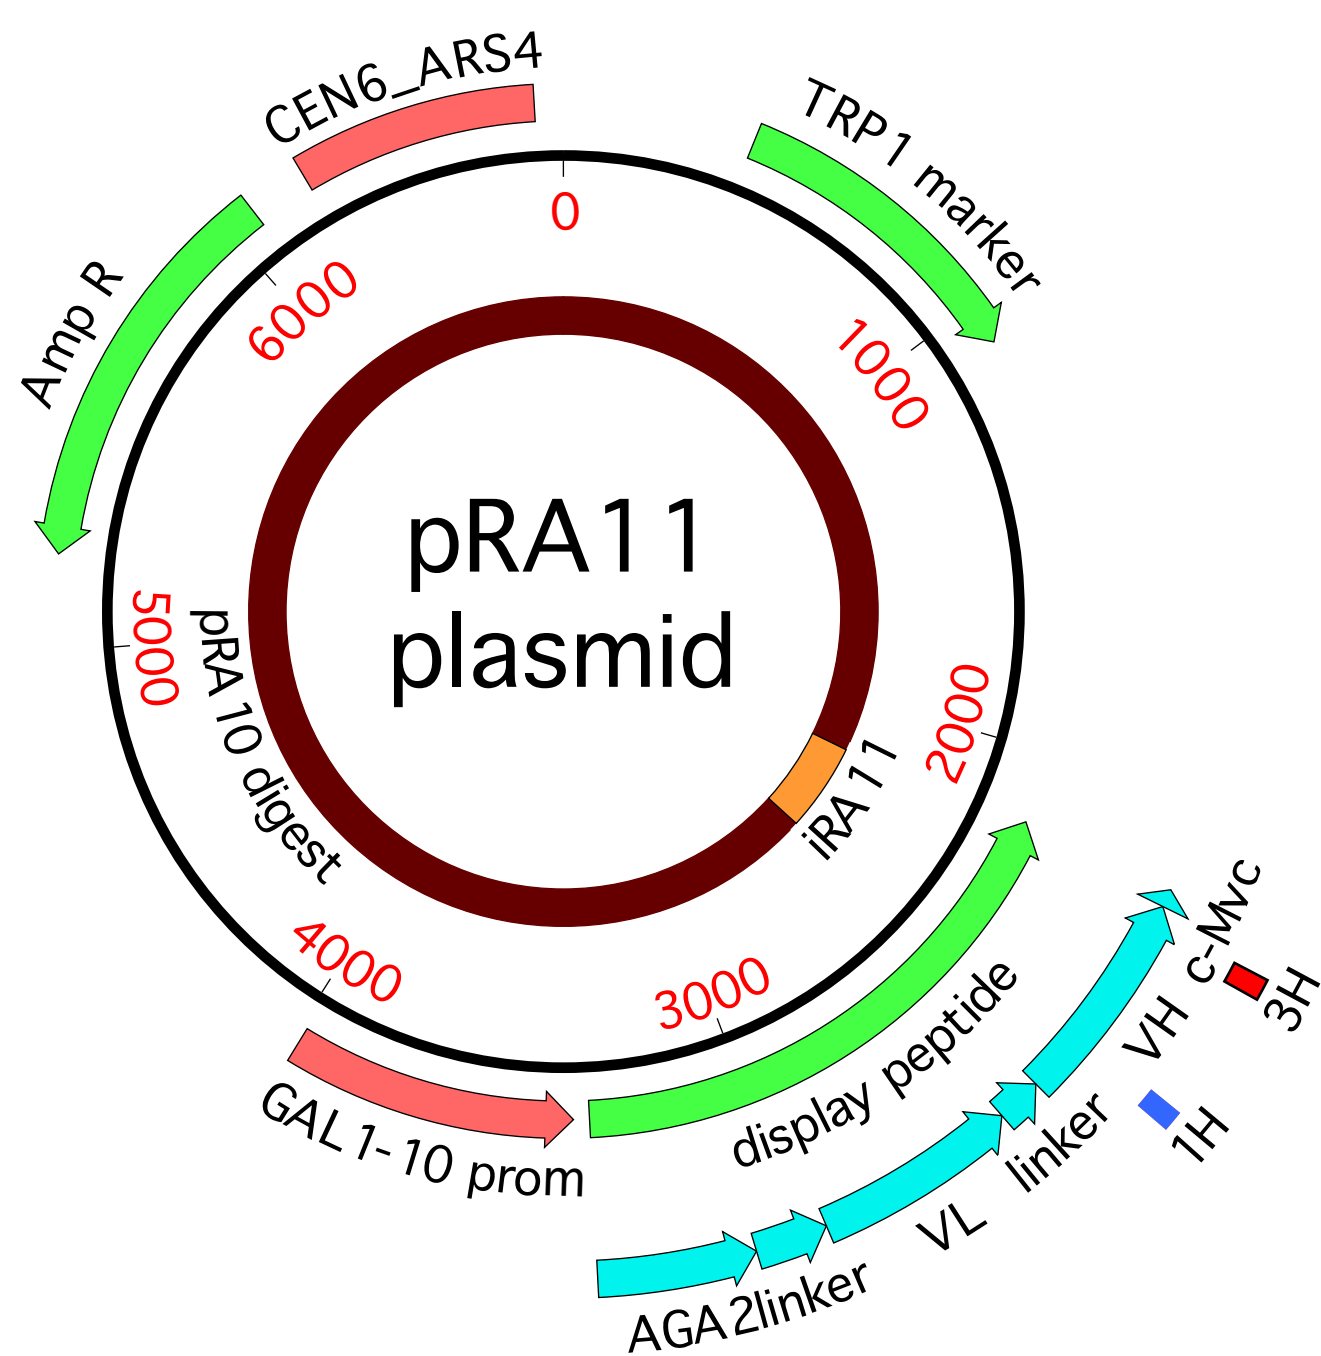

D

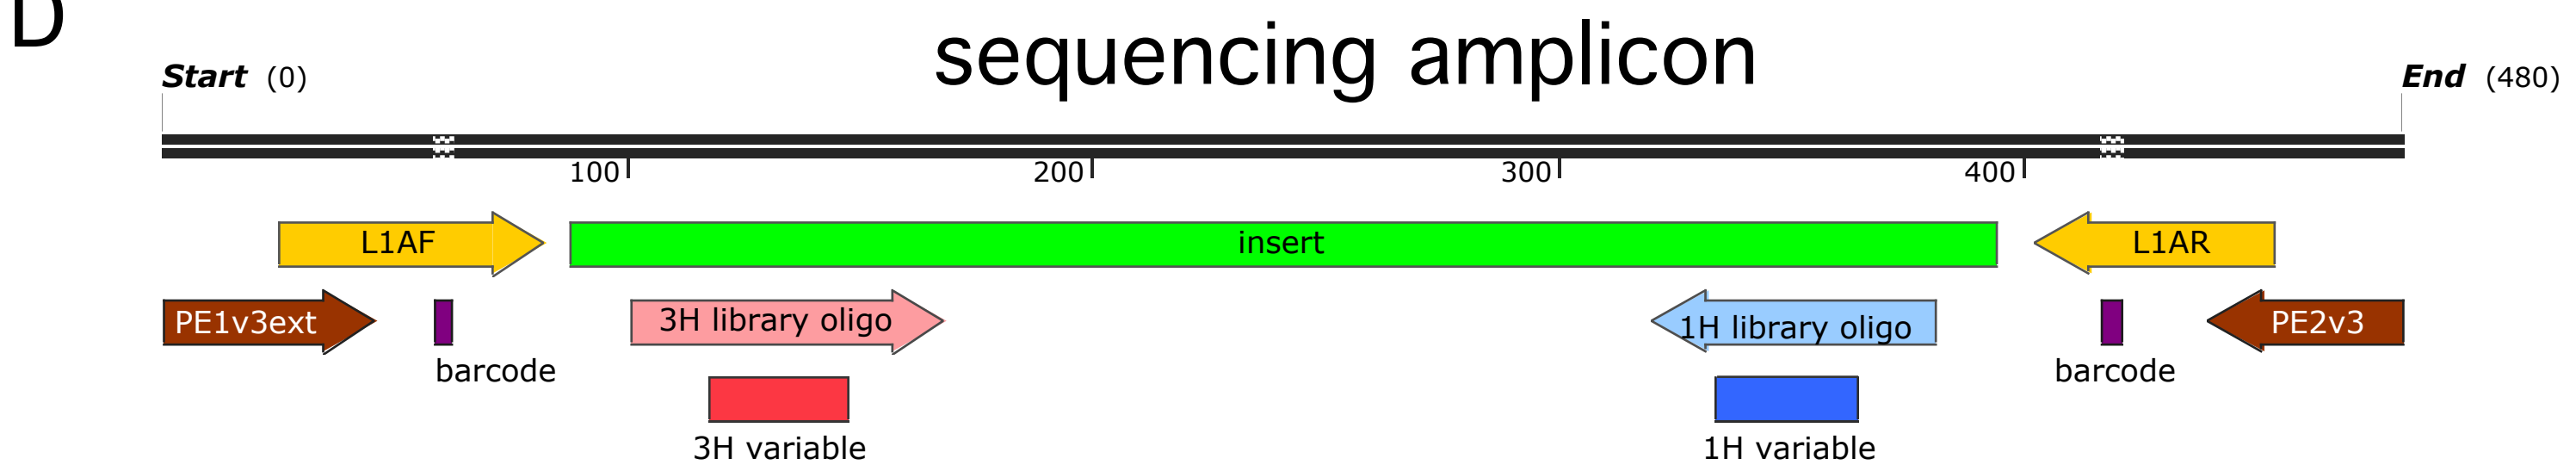

Supplement: supp [file elife-23156-supp-v1.zip]

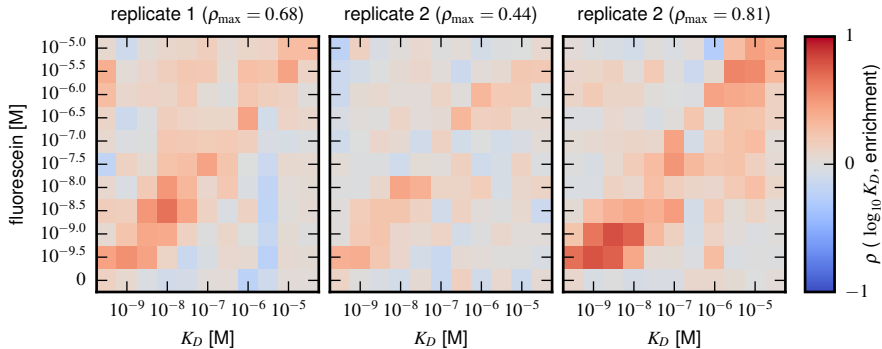

Supplement: supp [file elife-23156-supp-v1.zip]

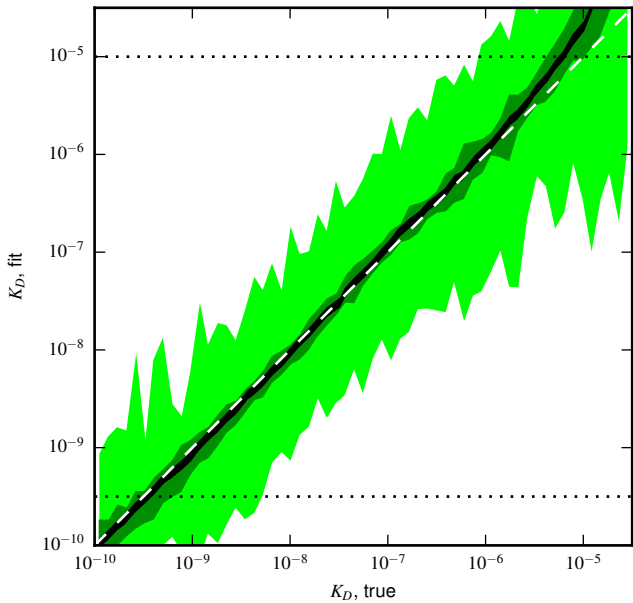

Supplement: supp [file elife-23156-supp-v1.zip]

A

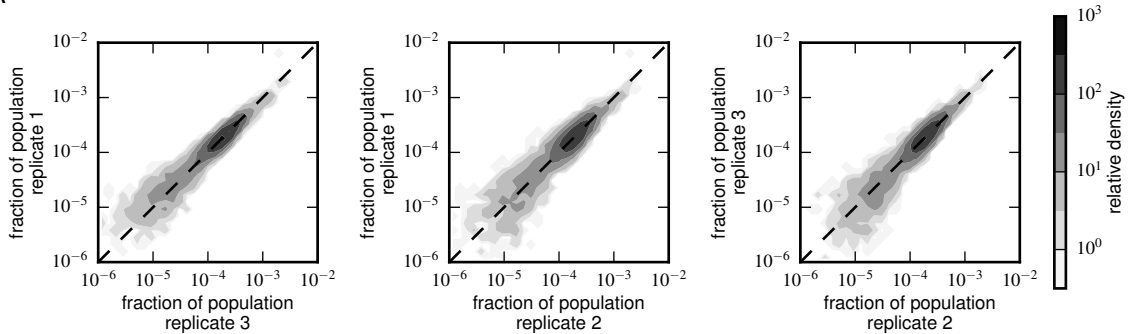

B

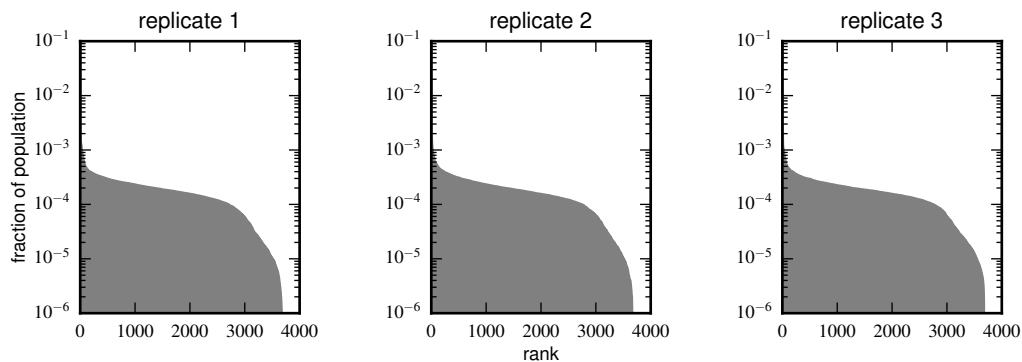

Supplement: supp [file elife-23156-supp-v1.zip]

A

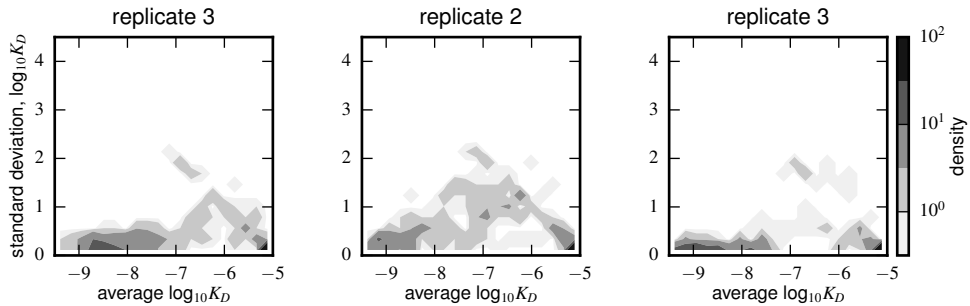

B

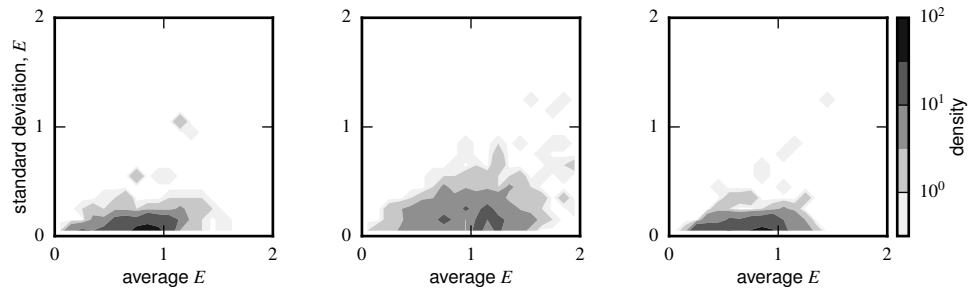

Supplement: supp [file elife-23156-supp-v1.zip]

A

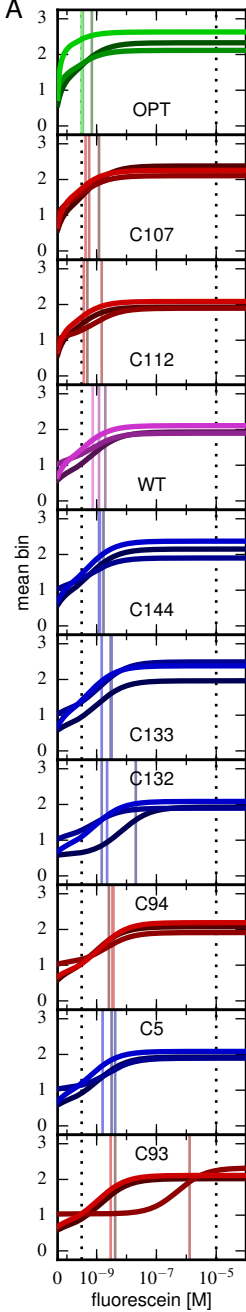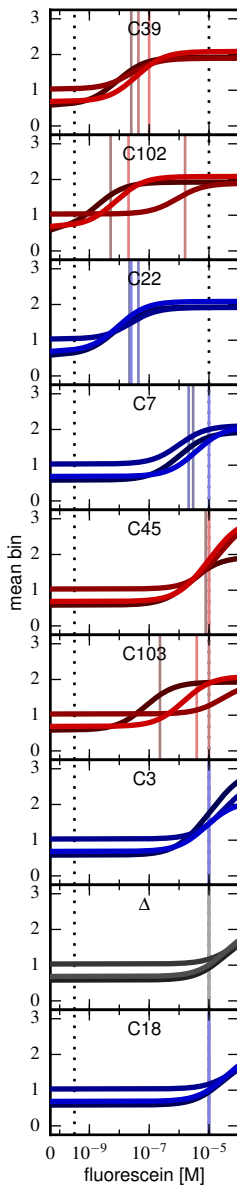

B

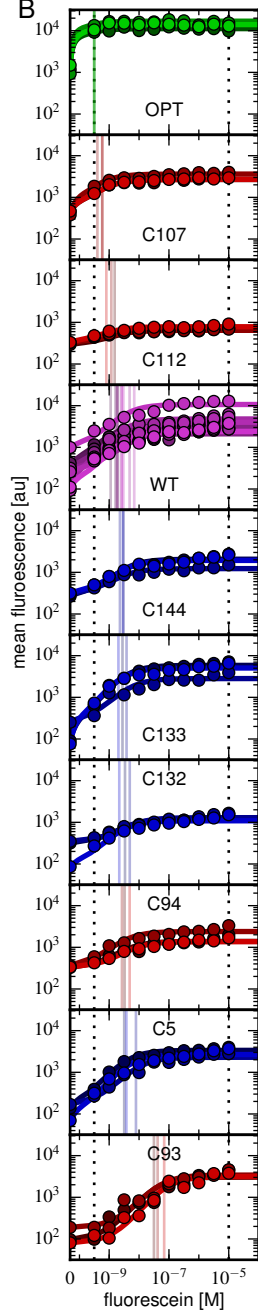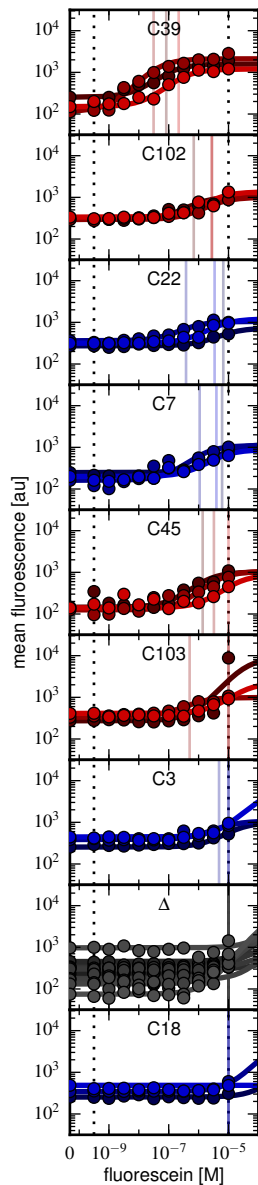

Supplement: supp [file elife-23156-supp-v1.zip]
